# Supplementary material for: Metabolic changes in response to varying whole-grain wheat and rye intake
Source: Springer Nature journal article supplement (doi:10.1038/s41538-024-00247-0), 2024-01-30
Supplement: MOESM2 [file 41538_2024_247_MOESM2_ESM.pdf]

## Aberystwyth University

### *Metabolic changes in response to varying whole-grain wheat and rye intake*

Koistinen, Ville M.; Haldar, Sumanto; Tuomainen, Marjo; Lehtonen, Marko; Klåvus, Anton; Draper, John; Lloyd, Amanda; Beckmann, Manfred; Bal, Wendy; Ross, Alastair B.; Brandt, Kirsten; Fawcett, Lee; Seal, Chris; Hanhineva, Kati

*Published in:*

npj Science of Food

*DOI:*

[10.1038/s41538-024-00247-0](https://doi.org/10.1038/s41538-024-00247-0)

*Publication date:*

2024

*Citation for published version (APA):*

Koistinen, V. M., Haldar, S., Tuomainen, M., Lehtonen, M., Klåvus, A., Draper, J., Lloyd, A., Beckmann, M., Bal, W., Ross, A. B., Brandt, K., Fawcett, L., Seal, C., & Hanhineva, K. (2024). Metabolic changes in response to varying whole-grain wheat and rye intake. *npj Science of Food*, 8(1), Article 8. <https://doi.org/10.1038/s41538-024-00247-0>

#### Document License

CC BY

#### General rights

Copyright and moral rights for the publications made accessible in the Aberystwyth Research Portal (the Institutional Repository) are retained by the authors and/or other copyright owners and it is a condition of accessing publications that users recognise and abide by the legal requirements associated with these rights.

- Users may download and print one copy of any publication from the Aberystwyth Research Portal for the purpose of private study or research.
- You may not further distribute the material or use it for any profit-making activity or commercial gain
- You may freely distribute the URL identifying the publication in the Aberystwyth Research Portal

#### Take down policy

If you believe that this document breaches copyright please contact us providing details, and we will remove access to the work immediately and investigate your claim.

tel: +44 1970 62 2400

email: [is@aber.ac.uk](mailto:is@aber.ac.uk)

## Supplementary Material

### Supplementary Figure 1

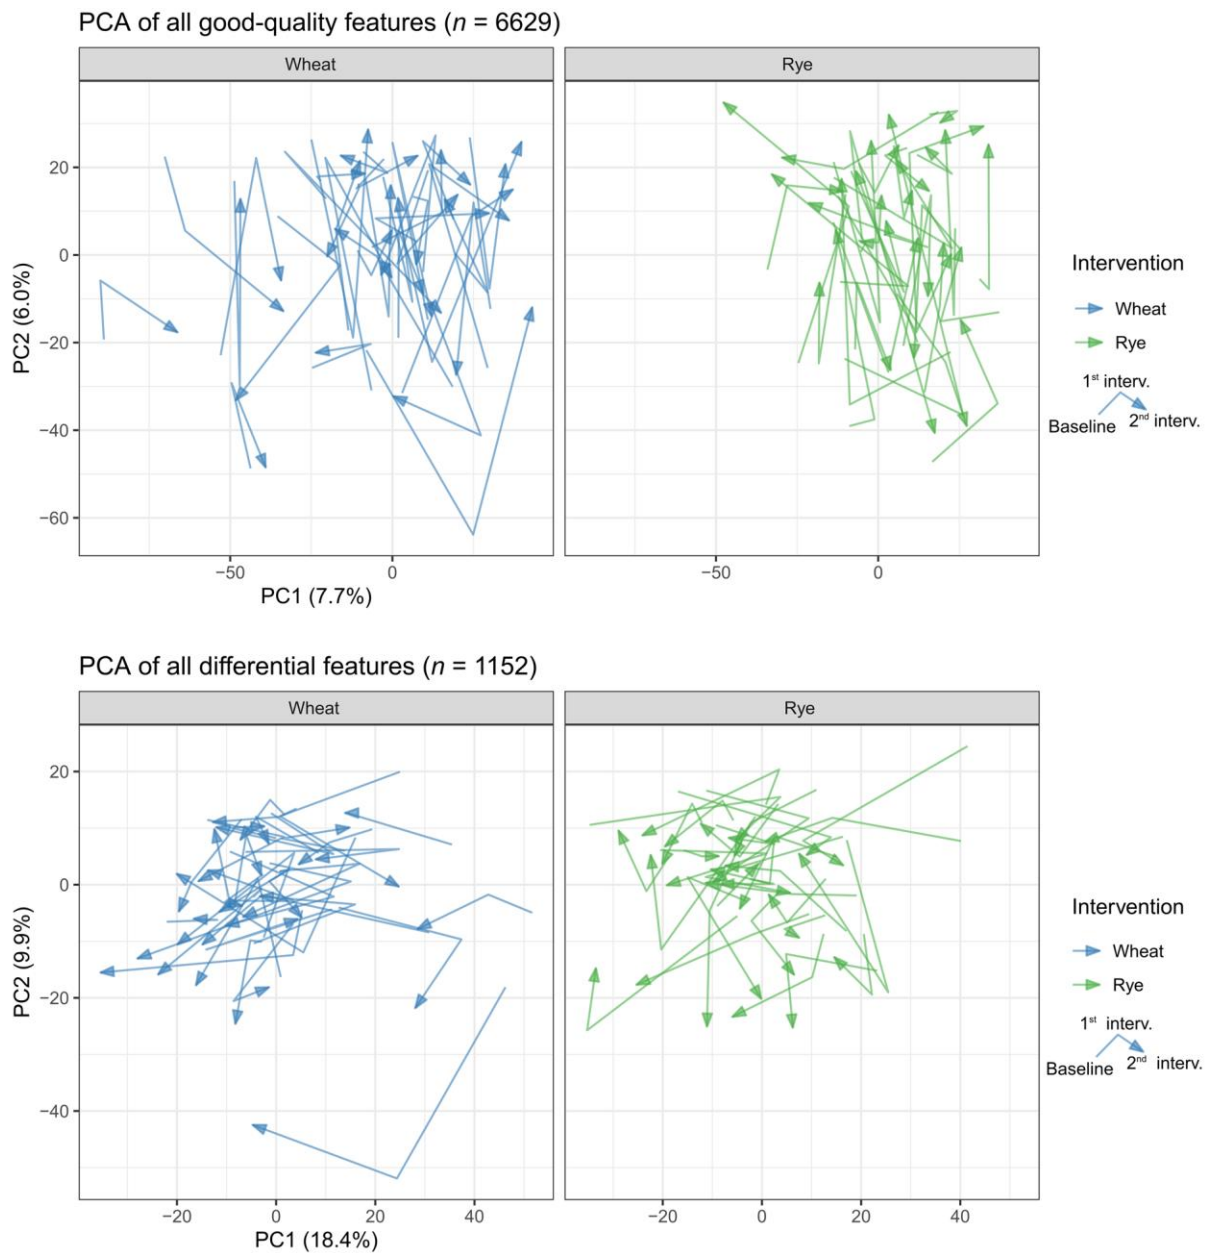

**Supplementary Figure 1.** Principal component analysis (PCA) of the dataset based on the levels of all the good-quality features after drift correction ( $n = 6629$ ) and all the differential good-quality features in the statistical comparisons ( $n = 1152$ ) from the four analytical modes, divided into two identical scale figures based on the intervention group. The arrows represent the changes of the metabolite profiles of each subject from baseline (beginning of arrow) to the second intervention (arrowhead). The pooled QC samples ( $n = 19$ ) were used to control and validate the uniformity of the data throughout the analytical runs.

**Supplementary Figure 2**

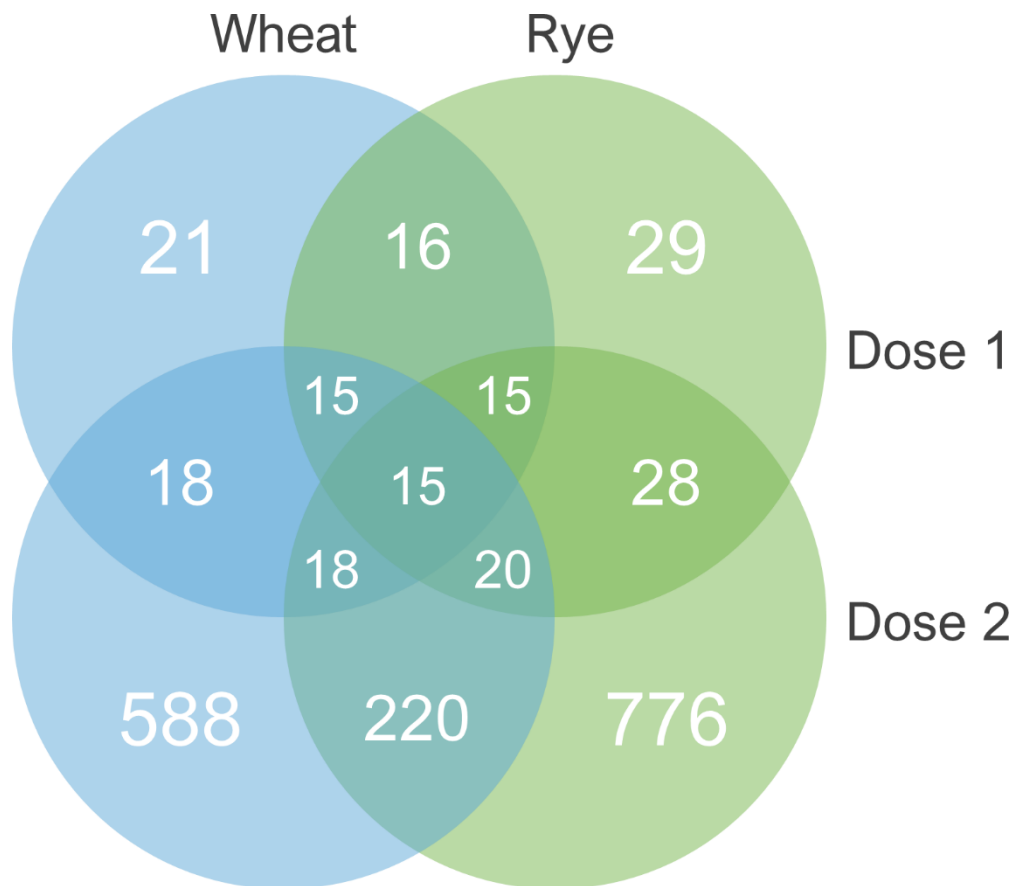

**Supplementary Figure 2.** Euler diagram of the statistically significant ( $q < 0.1$ ) good-quality molecular features in each grain/dose group compared to baseline.

### Supplementary Figure 3

a

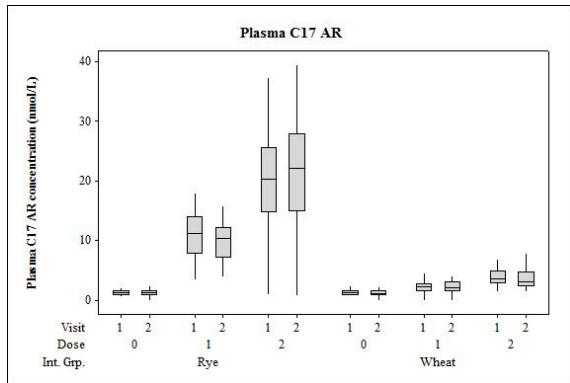

b

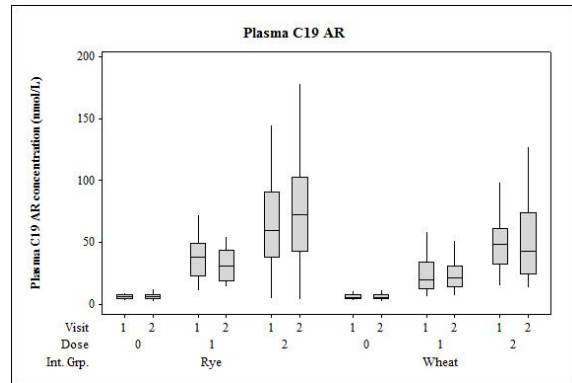

c

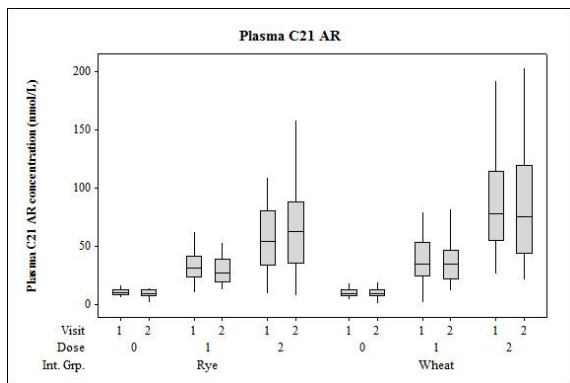

d

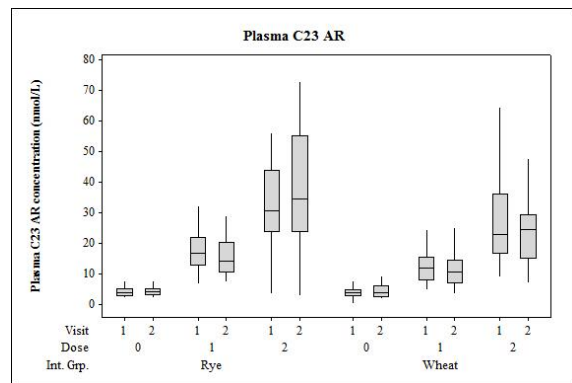

e

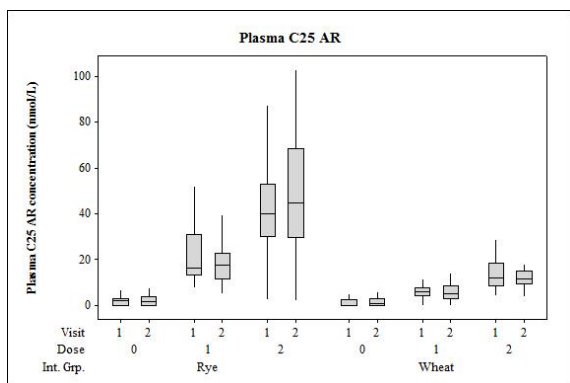

f

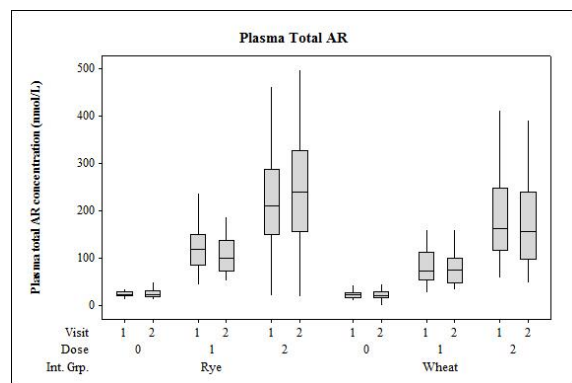

**Supplementary Figure 3.** Changes in individual (a, C17; b, C19; c, C21; d, C23; e, C25) and total (f) plasma AR homologue concentrations with increasing intake of WGR or GWG. Visit 1 and Visit 2 are repeated plasma samples taken two days apart at the end of each four-week intervention period. Box plots represent median values and interquartile range.

## Supplementary Figure 4

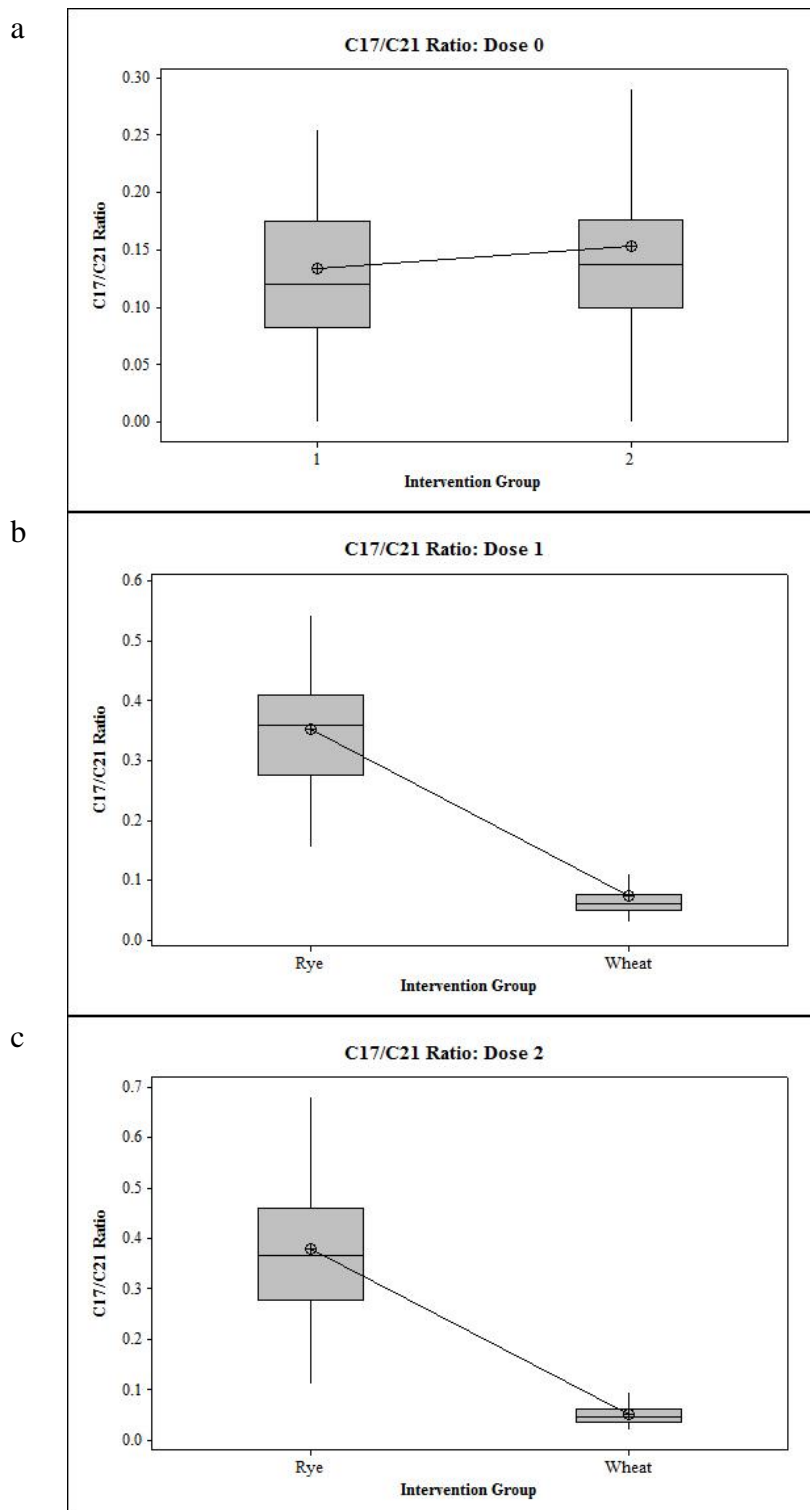

**Supplementary Figure 4.** Plasma C17:0 to C21:0 AR homologue ratio for WGR and WGW groups at the end of each dose of dietary intervention. Box plots represent median values and interquartile range; circles denote mean values.

**Supplementary Figure 5**

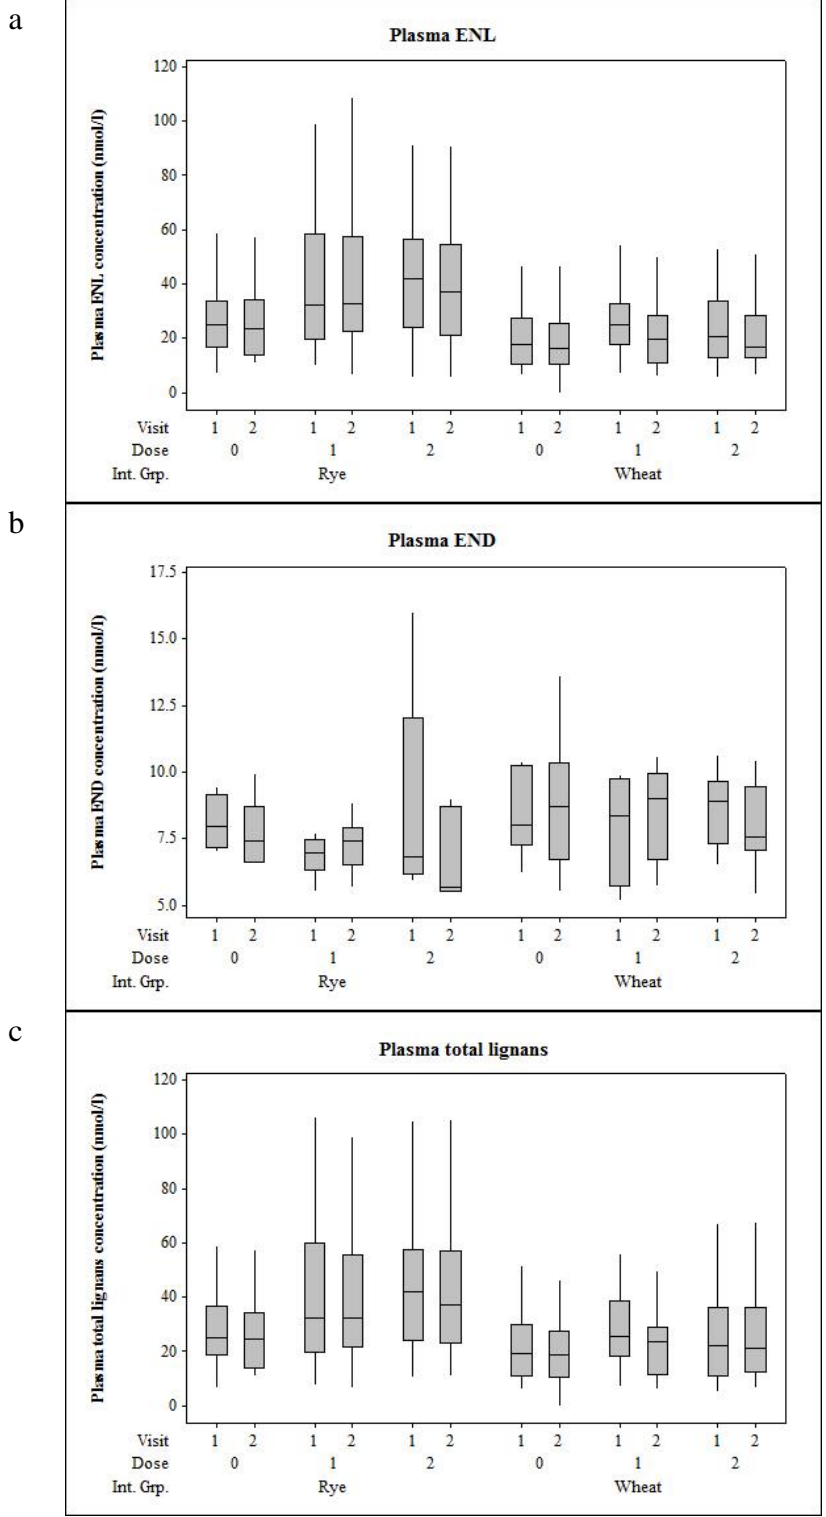

**Supplementary Figure 5.** Changes in plasma concentrations of enterolactone (A, ENL), enterodiol (B, END) and total ML (C) with increasing intake of WGR or WGW. Visit 1 and Visit 2 are repeated plasma samples taken two days apart at the end of each four-week intervention period. Box plots represent median values and interquartile range.

## Supplementary Figure 6

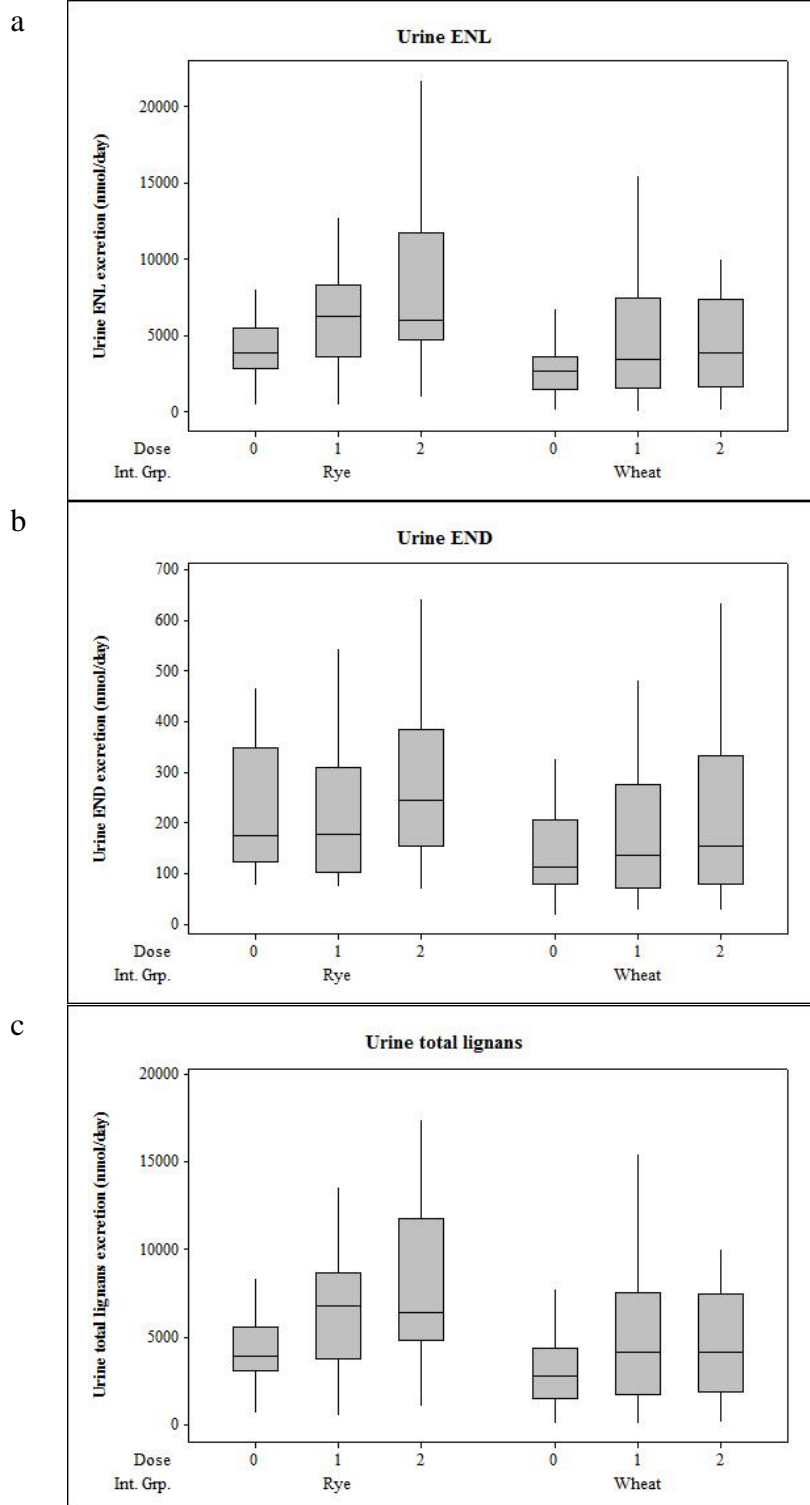

**Supplementary Figure 6.** Changes in daily urinary excretions of enterolactone (A, ENL), enterodiol (B, END) and total ML (C) with increasing intake of WGR or WGW. Box plots represent median values and interquartile range.

Supplementary Figure 7

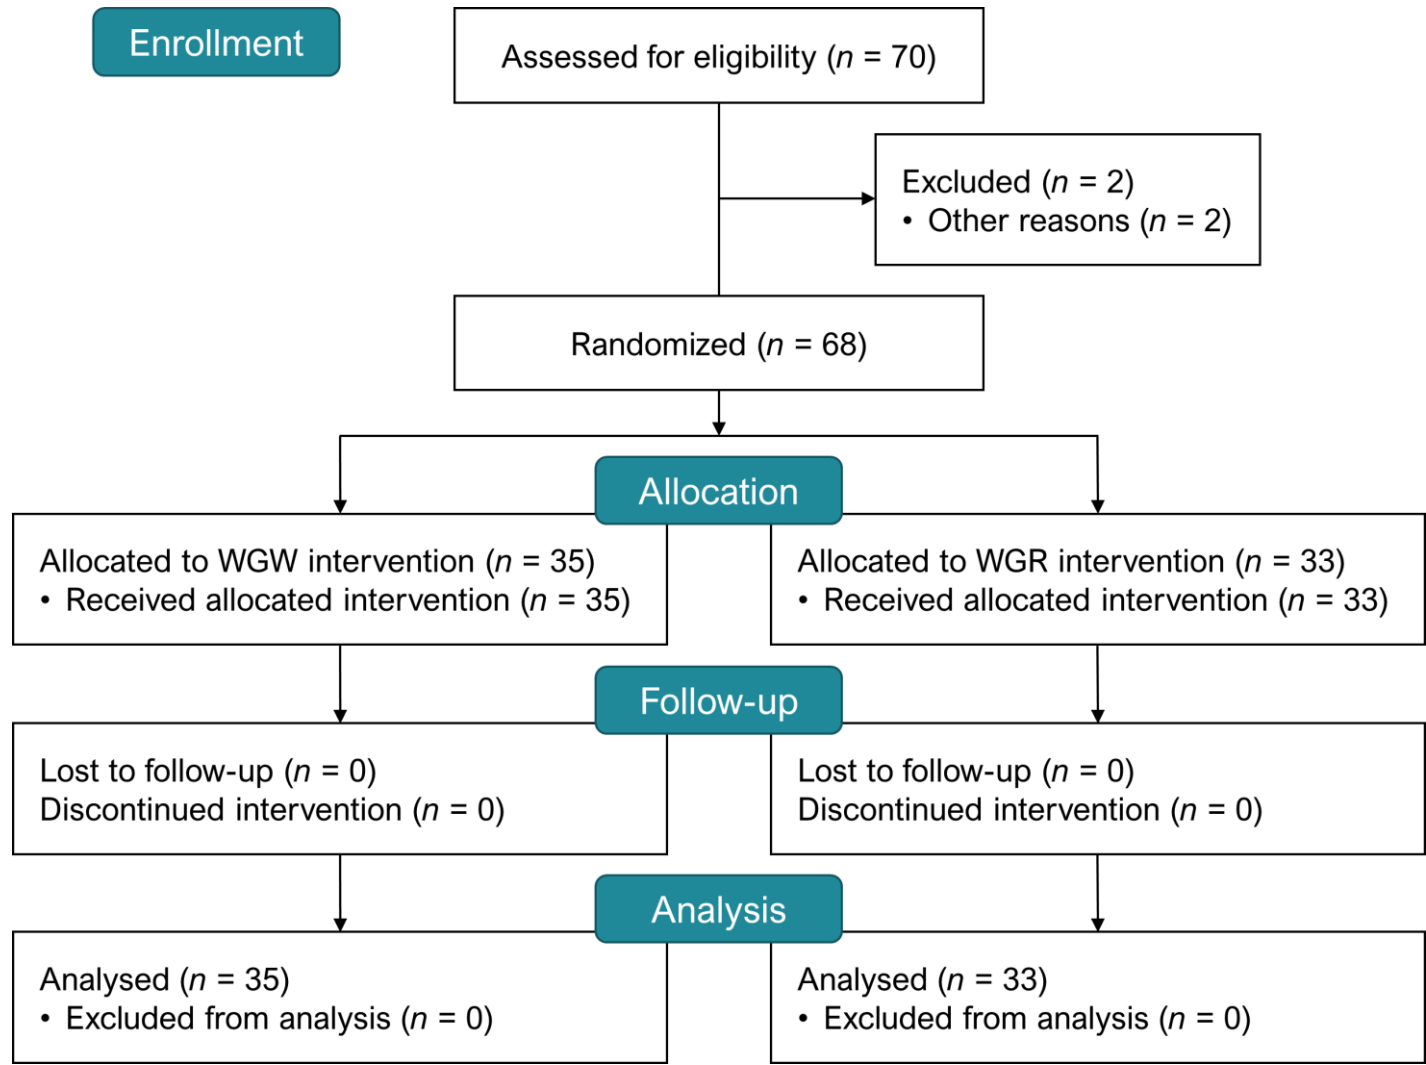

Supplementary Figure 7. The participant flowchart.



**Supplementary Figure 8**

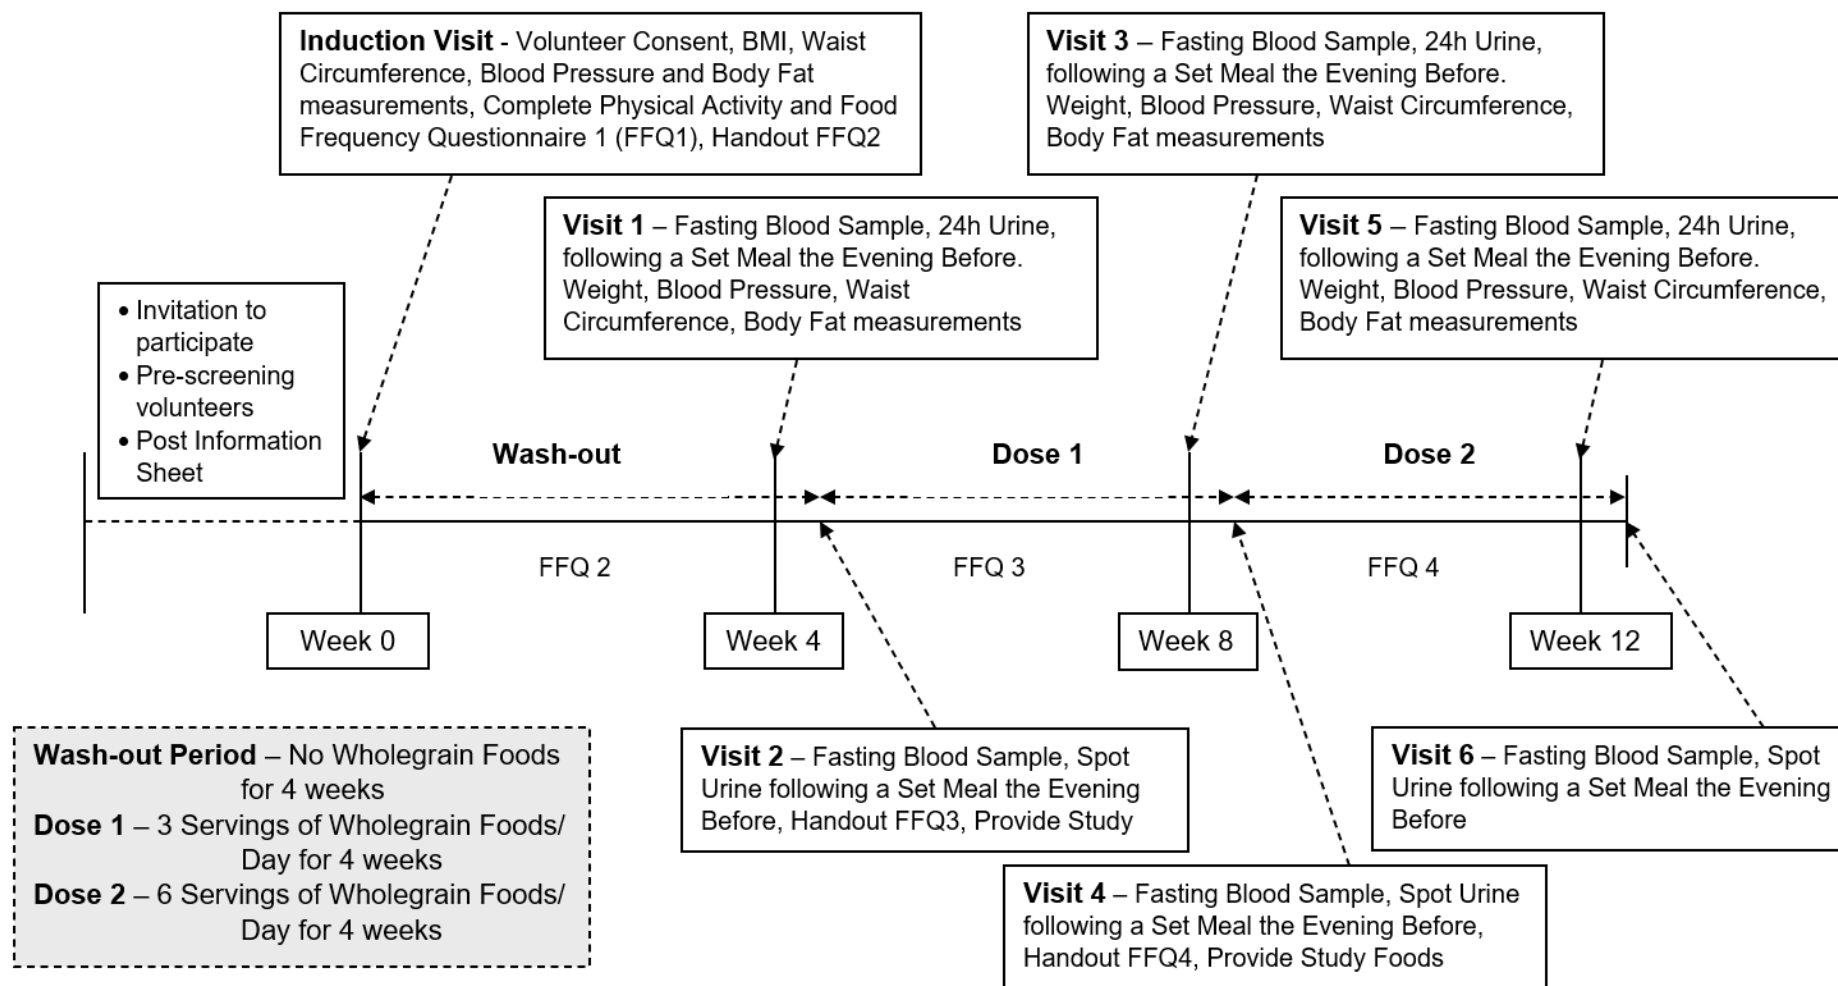

**Supplementary Figure 8.** The GrainMark study design flowchart.

**Supplementary Table 1.** Intervention food selection provided during the study.

| Mean daily intake | Whole-Grain Wheat Group |       |          |                          |        |                        |        |                          | Whole-Grain Rye Group |       |          |                        |        |       |        |                          |
|-------------------|-------------------------|-------|----------|--------------------------|--------|------------------------|--------|--------------------------|-----------------------|-------|----------|------------------------|--------|-------|--------|--------------------------|
|                   | Induction Visit         |       | Wash-out |                          | Dose 1 |                        | Dose 2 |                          | Induction Visit       |       | Wash-out |                        | Dose 1 |       | Dose 2 |                          |
|                   | Mean                    | SD    | Mean     | SD                       | Mean   | SD                     | Mean   | SD                       | Mean                  | SD    | Mean     | SD                     | Mean   | SD    | Mean   | SD                       |
| Energy (MJ)       | 12.19                   | 0.39  | 11.87    | 0.48                     | 11.72  | 0.36                   | 12.93  | 0.36                     | 12.59                 | 0.42  | 12.38    | 0.35                   | 12.98  | 0.38  | 14.12  | 0.40                     |
| Carbohydrate (g)  | 368.1                   | 140.0 | 353.6    | 174.3                    | 350.3  | 119.3                  | 408.9  | 120.8                    | 376.1                 | 127.3 | 369.2    | 118.4                  | 374.9  | 105.3 | 450.7  | <b>141.2<sup>A</sup></b> |
| Total fat (g)     | 90.9                    | 33.6  | 85.2     | 43.7                     | 80.8   | 31.3                   | 88.7   | 32.5                     | 96.4                  | 45.3  | 91.3     | 36.0                   | 97.0   | 32.1  | 100.6  | <b>39.1<sup>aA</sup></b> |
| - SFA (g)         | 26.6                    | 10.7  | 27.1     | 15.2                     | 25.4   | 12.1                   | 27.0   | 12.6                     | 26.9                  | 13.3  | 27.6     | 13.4                   | 27.9   | 10.1  | 27.7   | 12.7                     |
| - PUFA (g)        | 8.8                     | 2.9   | 9.1      | 4.1                      | 8.6    | 3.6                    | 9.5    | 4.0                      | 10.6                  | 4.2   | 10.1     | 3.8                    | 11.1   | 4.1   | 11.0   | 3.5                      |
| - MUFA (g)        | 21.1                    | 7.1   | 22.3     | 11.7                     | 20.6   | 8.9                    | 22.6   | 10.3                     | 23.6                  | 10.5  | 23.7     | 9.4                    | 24.7   | 8.21  | 23.1   | 9.1                      |
| Protein (g)       | 100.0                   | 32.1  | 98.4     | 35.9                     | 97.0   | 28.4                   | 108.8  | 31.6                     | 105.5                 | 28.3  | 97.6     | 28.8                   | 101.2  | 26.0  | 111.2  | 28.9                     |
| Alcohol (g)       | 41.6                    | 38.2  | 46.8     | 43.3                     | 50.2   | 55.9                   | 42.5   | 47.9                     | 40.9                  | 33.1  | 48.6     | 41.4                   | 56.8   | 64.6  | 44.2   | 33.7                     |
| Fibre (g)†        | 28.3                    | 12.0  | 18.2     | <b>6.7<sup>C</sup></b>   | 24.3   | <b>7.1<sup>A</sup></b> | 36.0   | <b>10.7<sup>cC</sup></b> | 27.9                  | 8.5   | 20.1     | <b>6.0<sup>c</sup></b> | 23.3   | 6.2   | 30.5   | <b>9.2<sup>C</sup></b>   |
| Folate (µg)       | 402.9                   | 132.0 | 375.5    | 125.4                    | 371.9  | 146.7                  | 431.5  | 125.6                    | 411.6                 | 125.9 | 383.0    | 109.9                  | 351.9  | 105.6 | 378.0  | 121.4                    |
| Vitamin B6 (mg)   | 2.8                     | 0.9   | 2.8      | 0.9                      | 2.8    | 0.9                    | 3.2    | 0.9                      | 2.9                   | 0.8   | 2.9      | 0.7                    | 2.7    | 0.7   | 2.8    | 0.8                      |
| Thiamin (mg)      | 2.3                     | 0.9   | 2.0      | 0.8                      | 2.2    | 0.7                    | 2.9    | <b>0.8<sup>bc</sup></b>  | 2.4                   | 0.6   | 2.0      | 0.5                    | 2.1    | 0.5   | 2.5    | <b>0.7<sup>A</sup></b>   |
| Riboflavin (mg)   | 2.1                     | 0.7   | 2.0      | 0.8                      | 2.3    | 0.7                    | 2.9    | <b>0.7<sup>cC</sup></b>  | 2.1                   | 0.7   | 2.0      | 0.6                    | 1.9    | 0.5   | 2.1    | 0.6                      |
| Vitamin C (mg)    | 159.4                   | 64.5  | 146.8    | 57.9                     | 144.6  | 72.2                   | 140.2  | 64.3                     | 159.3                 | 76.6  | 153.3    | 63.7                   | 139.9  | 49.9  | 147.0  | 56.9                     |
| Vitamin E (mg)    | 7.9                     | 2.9   | 6.6      | 2.3                      | 6.6    | 2.1                    | 7.4    | 2.1                      | 8.7                   | 3.1   | 7.5      | 2.5                    | 8.8    | 2.8   | 11.1   | <b>2.9<sup>bc</sup></b>  |
| Sodium (g)        | 4.1                     | 1.6   | 4.0      | 1.9                      | 3.6    | 1.2                    | 4.3    | 1.5                      | 4.4                   | 1.4   | 4.1      | 1.3                    | 4.3    | 1.5   | 5.1    | <b>1.7<sup>a</sup></b>   |
| Potassium (g)     | 4.8                     | 1.3   | 4.4      | 1.3                      | 4.4    | 1.1                    | 4.8    | 1.3                      | 4.9                   | 1.4   | 4.5      | 1.0                    | 4.7    | 1.2   | 5.0    | 1.2                      |
| Calcium (mg)      | 955.7                   | 298.9 | 978.3    | 504.8                    | 875.5  | 335.6                  | 854.4  | 261.8                    | 978.6                 | 299.9 | 952.7    | 306.0                  | 1008.0 | 327.9 | 1127.9 | 342.3                    |
| Iron (mg)         | 20.3                    | 8.3   | 17.0     | 6.3                      | 19.2   | 6.8                    | 24.2   | <b>6.4<sup>C</sup></b>   | 20.9                  | 5.8   | 17.9     | 4.7                    | 19.6   | 6.1   | 22.2   | <b>5.9<sup>A</sup></b>   |
| Manganese (mg)    | 7.6                     | 3.3   | 4.9      | <b>1.6<sup>c</sup></b>   | 5.9    | <b>2.0<sup>a</sup></b> | 8.5    | <b>2.9<sup>C</sup></b>   | 7.7                   | 3.0   | 5.2      | 1.6                    | 6.3    | 1.9   | 8.1    | <b>2.7<sup>C</sup></b>   |
| Magnesium (mg)    | 489.8                   | 175.9 | 369.6    | <b>124.9<sup>b</sup></b> | 427.3  | 117.8                  | 537.8  | <b>142.5<sup>C</sup></b> | 508.7                 | 150.0 | 390.9    | 93.2                   | 457.8  | 128.7 | 538.5  | <b>137.3<sup>C</sup></b> |
| Phosphorus (g)    | 1.8                     | 0.6   | 1.5      | 0.6                      | 1.6    | 0.5                    | 2.0    | <b>0.6<sup>B</sup></b>   | 1.8                   | 0.5   | 1.5      | 0.4                    | 1.7    | 0.4   | 2.0    | <b>0.5<sup>C</sup></b>   |
| Zinc (mg)         | 12.7                    | 4.9   | 10.2     | 3.9                      | 11.0   | 3.4                    | 13.8   | <b>4.2<sup>B</sup></b>   | 12.6                  | 3.8   | 10.0     | 2.9                    | 11.5   | 3.1   | 13.5   | <b>3.5<sup>C</sup></b>   |

†Englyst fiber

Values in bold that are significantly different from corresponding Induction Week value: <sup>a</sup>p < 0.05; <sup>b</sup>p < 0.01; <sup>c</sup>p < 0.001. Values in bold that are significantly different from corresponding Wash-out value: <sup>A</sup>p < 0.05; <sup>B</sup>p < 0.01; <sup>C</sup>p < 0.001.

**Supplementary Table 2.** Pre-sampling evening meal.

| Mean daily intake<br>(mg/d) | WGW group |      |        |      | WGR group |      |        |       |
|-----------------------------|-----------|------|--------|------|-----------|------|--------|-------|
|                             | Dose 1    |      | Dose 2 |      | Dose 1    |      | Dose 2 |       |
|                             | Mean      | SD   | Mean   | SD   | Mean      | SD   | Mean   | SD    |
| C17 alkylresorcinol         | 1.4       | 0.23 | 2.9    | 0.41 | 11.0      | 0.99 | 23.6   | 2.58  |
| C19 alkylresorcinol         | 9.6       | 1.92 | 20.9   | 3.37 | 13.1      | 1.46 | 28.6   | 3.78  |
| C21 alkylresorcinol         | 16.0      | 2.81 | 34.7   | 4.59 | 12.1      | 1.29 | 26.3   | 3.32  |
| C23 alkylresorcinol         | 4.5       | 0.82 | 9.8    | 1.19 | 7.4       | 0.77 | 16.1   | 1.99  |
| C25 alkylresorcinol         | 1.8       | 0.35 | 3.8    | 0.51 | 6.3       | 0.69 | 13.7   | 1.78  |
| Total alkylresorcinol       | 33.2      | 5.97 | 72.1   | 9.86 | 49.9      | 5.19 | 108.3  | 13.40 |
| C17 to C21 intake ratio     | 0.1       | 0.01 | 0.1    | 0.01 | 0.9       | 0.02 | 0.9    | 0.03  |

**Supplementary Table 3.** Reported total WG intake for WG wheat (WGW) and WG rye (WGR) groups during the study, using Food Frequency Questionnaires (FFQ). Wash-out (Dose 0) was a 4 wk whole grain avoidance diet, Dose 1 required 48 g/d whole grain intake for 4 weeks and Dose 2 required 96 g/d whole grain intake for a further 4 weeks. Mean daily intakes of separate alkylresorcinol homologues for whole grain wheat and whole grain rye groups and AR C17: AR C21 intake ratios calculated from AR content of intervention foods and self-reported intervention food intake using food records.

| Biomarker | WGW Group               |       |         |          |                     | WGR Group  |       |         |          |                     |
|-----------|-------------------------|-------|---------|----------|---------------------|------------|-------|---------|----------|---------------------|
|           | Slope (ln) <sup>a</sup> | R     | P value | Constant | Regression equation | Slope (ln) | R     | P value | Constant | Regression equation |
| Plasma    |                         |       |         |          |                     |            |       |         |          |                     |
| ENL       | -*                      | -     | -       | -        | -                   | +0.002     | 0.141 | 0.0301  | 5.076    | 5.08 + 0.002WG      |
| END       | -                       | -     | -       | -        | -                   | -          | -     | -       | -        | -                   |
| Total ML  | -                       | -     | -       | -        | -                   | -          | -     | -       | -        | -                   |
| 24h Urine |                         |       |         |          |                     |            |       |         |          |                     |
| ENL       | +0.003                  | 0.197 | 0.0048  | +0.003   | 4.17 + 0.003 WG     | +0.003     | 0.214 | 0.0004  | 8.304    | 8.30 + 0.003WG      |
| END       | -                       | -     | -       | -        | -                   | -          | -     | -       | -        | -                   |
| Total ML  | +0.003                  | 0.210 | 0.0031  | +0.003   | 4.31 + 0.003 WG     | +0.003     | 0.207 | 0.0005  | 8.388    | 8.39 + 0.003WG      |

<sup>a</sup>Natural logarithm; \*Not detected

**Supplementary Table 4.** Mean and standard deviation (SD) of daily energy and nutrient intake during each stage of the intervention study.

|                                                                             | Supplier                           | Processing                        | Portion size (g) | WG (g per portion) | WG (serves per portion) | Alkylresorcinol (AR) homologues (%) |       |       |       |       | Total ARs (µg/g) |
|-----------------------------------------------------------------------------|------------------------------------|-----------------------------------|------------------|--------------------|-------------------------|-------------------------------------|-------|-------|-------|-------|------------------|
|                                                                             |                                    |                                   |                  |                    |                         | C17:0                               | C19:0 | C21:0 | C23:0 | C25:0 |                  |
| Whole-grain rye diet                                                        |                                    |                                   |                  |                    |                         |                                     |       |       |       |       |                  |
| Rye bread (50 % WG rye flour, 50 % sifted rye flour (40 % of bran removed)) | Village Bakery, Penrith, UK        | Sourdough fermentation and baking | 25               | 20                 | 1                       | 17.9                                | 23.3  | 20.9  | 12.6  | 11.0  | 752.7            |
| Rye porridge (ready-to-eat cereal)                                          | Raisio, Finland                    | Steamed and then rolled           | 35               | 32                 | 2                       | 19.5                                | 22.0  | 20.4  | 12.5  | 10.5  | 877.7            |
| Rye muesli (ready-to-eat cereal)                                            | Raisio, Finland/Cereal Partners UK | Steamed and then rolled           | 55               | 34                 | 2                       | 19.5                                | 22.0  | 20.4  | 12.5  | 10.5  | 877.7            |
| Rye pasta (20 % WG rye, 80 % refined wheat)                                 | Raisio, Finland                    | Extrusion, cooked by boiling      | 90               | 18                 | 1                       | 15.6                                | 19.7  | 21.3  | 13.8  | 10.2  | 331.1            |
| Whole-grain wheat diet                                                      |                                    |                                   |                  |                    |                         |                                     |       |       |       |       |                  |
| Whole-grain wheat bread                                                     | Allied Bakeries, Gateshead, UK     | Yeast fermentation and baking     | 36               | 20                 | 1                       | 3.4                                 | 26.7  | 41.7  | 11.3  | 4.6   | 499.9            |
| Shredded Wheat Fruitful (RTE cereal)                                        | Cereal Partners UK                 | Pressure cooked, flaked and baked | 55               | 32                 | 2                       | 4.3                                 | 25.8  | 43.0  | 11.6  | 4.0   | 422.7            |
| Weetabix (RTE cereal)                                                       | Weetabix, UK                       | Pressure cooked, flaked and baked | 19               | 15                 | 1                       | 4.3                                 | 26.6  | 43.5  | 11.9  | 4.9   | 547.7            |
| Whole-grain wheat pasta                                                     | Cereal Partners UK                 | Extrusion, cooked by boiling      | 54               | 48                 | 3                       | 0.8                                 | 11.4  | 47.8  | 22.7  | 8.6   | 477.0            |

**Supplementary Table 5.** Mean daily intakes of separate alkylresorcinol homologues for the WGW and WGR groups and AR C17 to AR C21 intake ratios during Dose 1 and Dose 2 periods as calculated from the alkylresorcinol content of intervention foods and self-reported intervention food intake using intervention food records.

| Meal Type                           | Quantity                                                      | Major Ingredients                                                         | Manufacturer                    |
|-------------------------------------|---------------------------------------------------------------|---------------------------------------------------------------------------|---------------------------------|
| Main Course –<br>'Chicken in a pot' | 1 portion, 450 g                                              | Roasted Chicken,<br>Roast Potatoes,<br>Mixed Vegetables in<br>Gravy Sauce | Sainsbury's<br>Supermarkets, UK |
| Desert – Chocolate<br>Éclair        | 1 piece, 75g                                                  | Whipping cream,<br>sugar, egg, wheat<br>flour, cocoa                      | Marks and Spencer<br>Plc, UK    |
| Water                               | 500 ml compulsory<br>with meal + 500 ml<br>optional overnight | Mineral Water                                                             | Sainsbury's<br>Supermarkets, UK |

**Supplementary Table 6.** Dose-response trends between WG intake against measured plasma and 24-hour urinary ENL, END and total ML concentrations in WGW and WGR groups, using linear mixed effect models, adjusted for age, gender and BMI. The slope is the mixed effect of the WG in g/day.

| Mean daily intake (mg/d) | WGW group |          |        |          | WGR group |          |        |          |
|--------------------------|-----------|----------|--------|----------|-----------|----------|--------|----------|
|                          | Dose 1    |          | Dose 2 |          | Dose 1    |          | Dose 2 |          |
|                          | Mean      | St. Dev. | Mean   | St. Dev. | Mean      | St. Dev. | Mean   | St. Dev. |
| C17 alkylresorcinol      | 1.4       | 0.23     | 2.9    | 0.41     | 11.0      | 0.99     | 23.6   | 2.58     |
| C19 alkylresorcinol      | 9.6       | 1.92     | 20.9   | 3.37     | 13.1      | 1.46     | 28.6   | 3.78     |
| C21 alkylresorcinol      | 16.0      | 2.81     | 34.7   | 4.59     | 12.1      | 1.29     | 26.3   | 3.32     |
| C23 alkylresorcinol      | 4.5       | 0.82     | 9.8    | 1.19     | 7.4       | 0.77     | 16.1   | 1.99     |
| C25 alkylresorcinol      | 1.8       | 0.35     | 3.8    | 0.51     | 6.3       | 0.69     | 13.7   | 1.78     |
| Total alkylresorcinol    | 33.2      | 5.97     | 72.1   | 9.86     | 49.9      | 5.19     | 108.3  | 13.40    |
| C17 to C21 intake ratio  | 0.1       | 0.01     | 0.1    | 0.01     | 0.9       | 0.02     | 0.9    | 0.03     |
